# Supplementary material for: Relations between the residential fast-food environment and the individual risk of cardiovascular diseases in The Netherlands: A nationwide follow-up study
Source: PubMed Central journal article supplement — Eur J Prev Cardiol. 2018 Apr 24;25(13):1397–405. doi: 10.1177/2047487318769458 (PMC6130123; doi:10.1177/2047487318769458), 2018-04-24
Supplement: Supplemental_material.pdf [file Supplemental_material.pdf]

## Supplementary Table 1

International Classification of Diseases ninth version (ICD-9) codes used for identification of hospital admissions and ICD-10 codes for mortality for cardiovascular disease, coronary heart disease stroke and heart failure.

|                        | <b>ICD-9 codes</b> | <b>ICD-10 codes</b> |
|------------------------|--------------------|---------------------|
| Cardiovascular disease | 390-459            | I00-I99             |
| Coronary heart disease | 410-414            | I20-I25             |
| Stroke                 | 430-438            | I60-I69             |
| Heart failure          | 428                | I50                 |
